# Supplementary material for: Local-Scale Diversity and Between-Year “Frozen Evolution” of Avian Influenza A Viruses in Nature
Source: PubMed Central journal article supplement (PMC4116140; doi:10.1371/journal.pone.0103053), 2014-07-30
Supplement: pone.0103053.s001.pdf [file pone.0103053.s001.pdf]

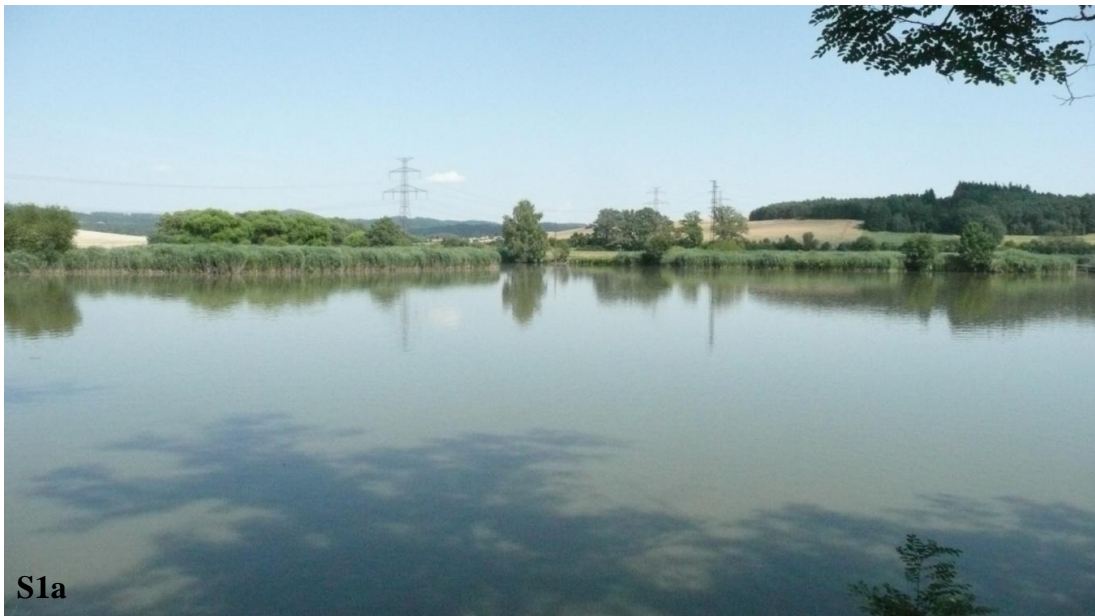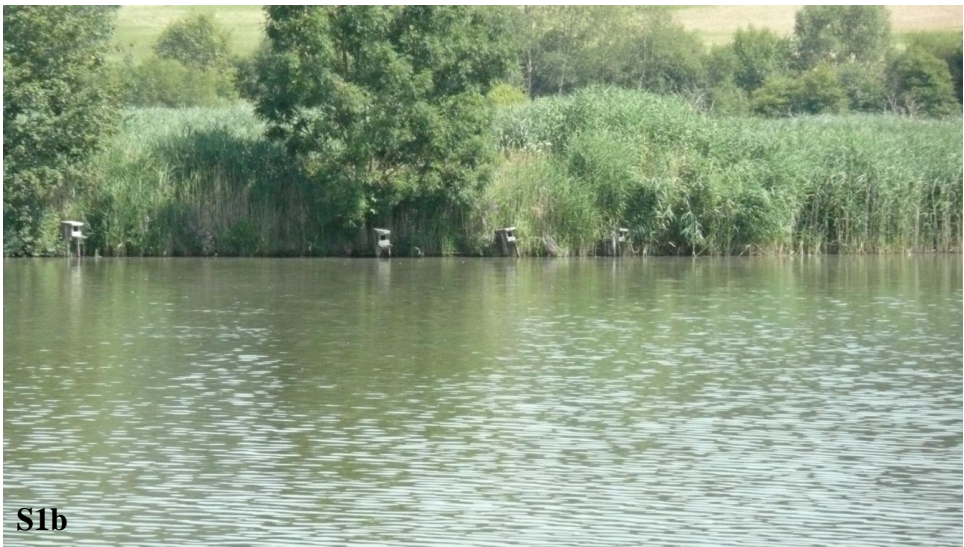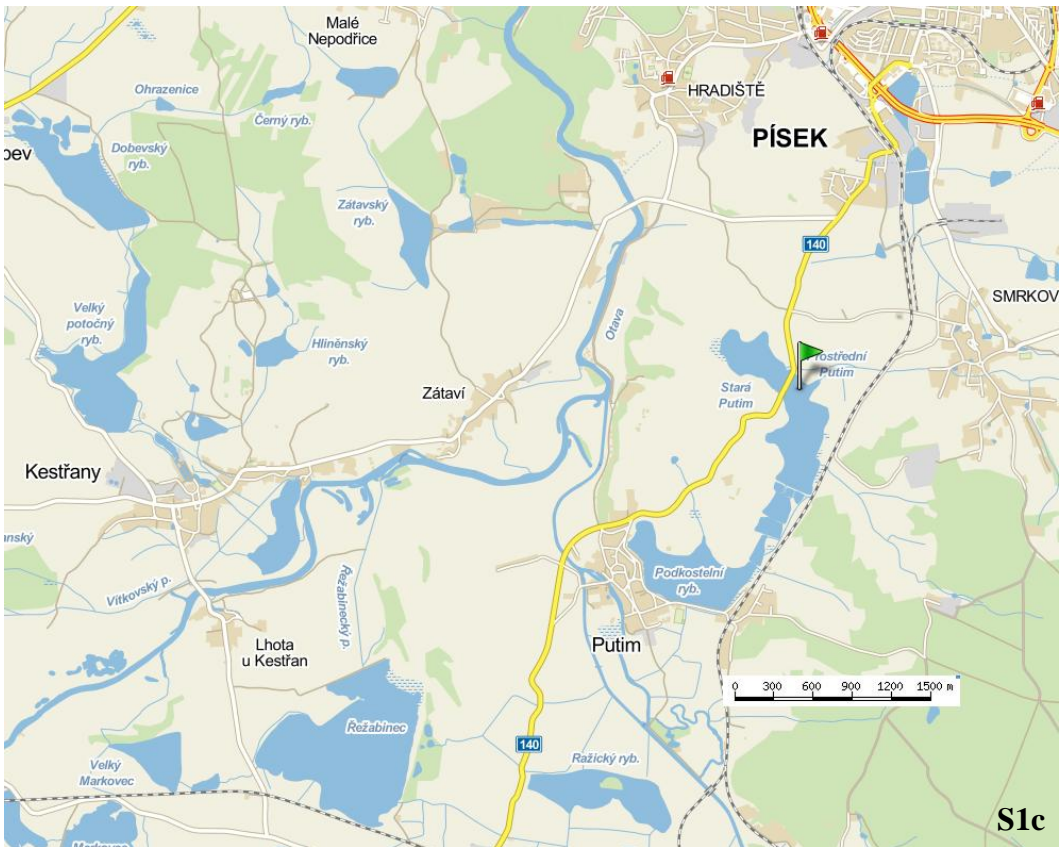

**Figure S1: Locality P.** The samples in 2009 were collected from mallards inhabiting the pond called Putim (GPS coordinates 49°16'42.629"N, 14°8'9.881"E). The green flag on the map S1c represents the position of the S1a view. Figure S1b shows wooden huts distributed along the shore. The map was generated by the [www.mapy.cz](http://www.mapy.cz).

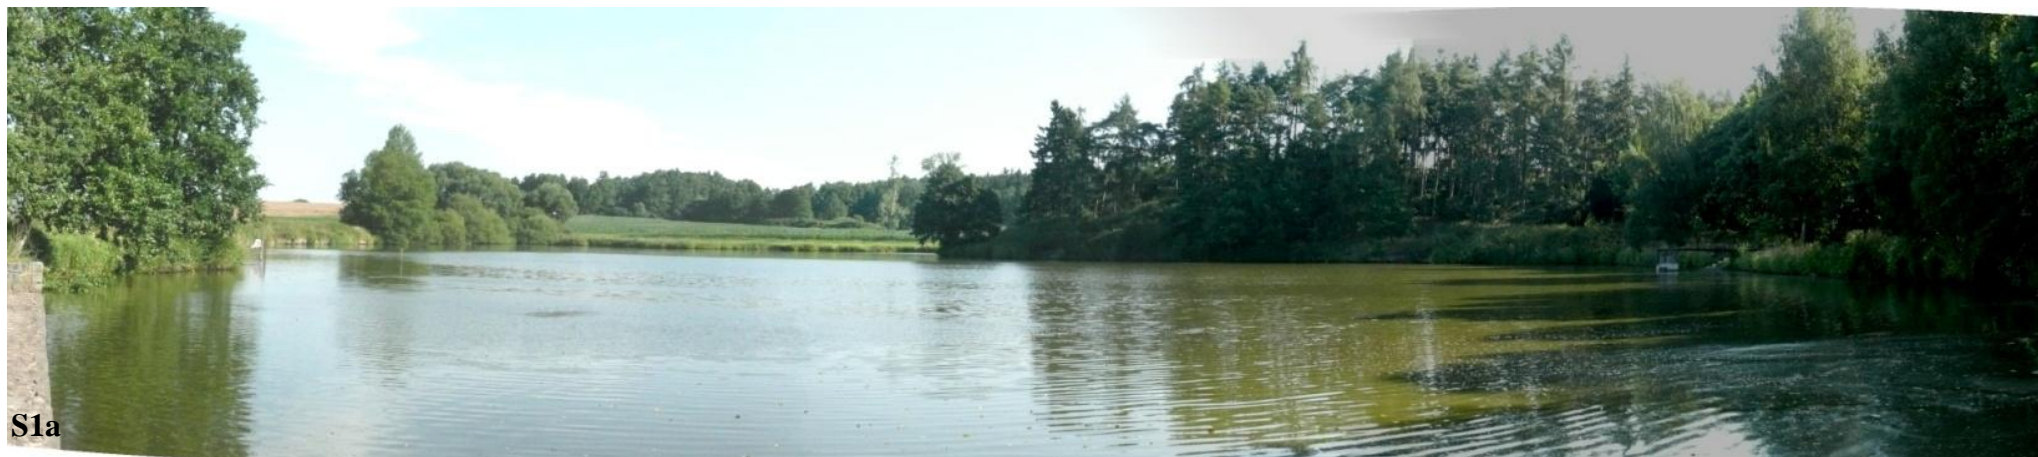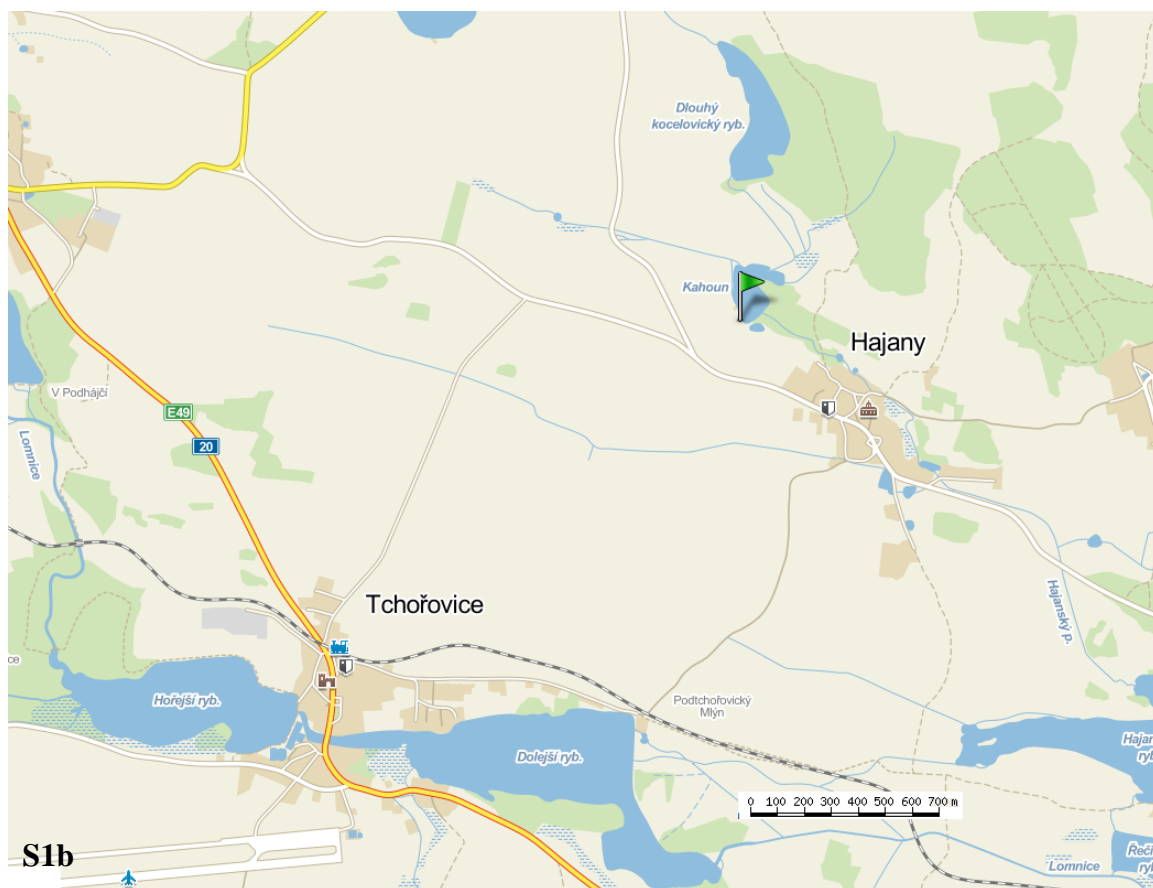

**Figure S2: Locality H.** The samples in 2010 were collected from mallards resided the pond called Kahoun which is situated near the Hajany village (GPS coordinates 49°26'59.547"N, 13°49'52.568"E). The green flag on the map S2b represents the position of the panoramic view S2a. The map was generated by the [www.mapy.cz](http://www.mapy.cz).

## S3a: PB2

| PB2 1038nt | P/9K | P/14K | P/17K | P/18K<br>H6 | P/18K<br>H11 | P/23K | P/25K | P/18T | H/1T | H/4T |
|------------|------|-------|-------|-------------|--------------|-------|-------|-------|------|------|
| P/9K       | ID   | 28    | 28    | 28          | 78           | 40    | 78    | 40    | 28   | 28   |
| P/14K      | 28   | ID    | 0     | 0           | 66           | 16    | 66    | 16    | 0    | 0    |
| P/17K      | 28   | 0     | ID    | 0           | 66           | 16    | 66    | 16    | 0    | 0    |
| P/18K_H6   | 28   | 0     | 0     | ID          | 66           | 16    | 66    | 16    | 0    | 0    |
| P/18K_H11  | 78   | 66    | 66    | 66          | ID           | 74    | 0     | 74    | 66   | 66   |
| P/23K      | 40   | 16    | 16    | 16          | 74           | ID    | 74    | 0     | 16   | 16   |
| P/25K      | 78   | 66    | 66    | 66          | 0            | 74    | ID    | 74    | 66   | 66   |
| P/18T      | 40   | 16    | 16    | 16          | 74           | 0     | 74    | ID    | 16   | 16   |
| H/1T       | 28   | 0     | 0     | 0           | 66           | 16    | 66    | 16    | ID   | 0    |
| H/4T       | 28   | 0     | 0     | 0           | 66           | 16    | 66    | 16    | 0    | ID   |

## S3b: PB1

| PB1 825nt | P/4K | P/9K | P/12K | P/14K | P/17K | P/18K<br>H6 | P/18K<br>H11 | P/23K | P/25K | P/18T | H/1T | H/4T |
|-----------|------|------|-------|-------|-------|-------------|--------------|-------|-------|-------|------|------|
| P/4K      | ID   | 56   | 57    | 58    | 58    | 58          | 60           | 0     | 60    | 0     | 58   | 58   |
| P/9K      | 56   | ID   | 26    | 40    | 40    | 40          | 36           | 56    | 36    | 56    | 40   | 40   |
| P/12K     | 57   | 26   | ID    | 40    | 40    | 40          | 36           | 57    | 36    | 57    | 40   | 40   |
| P/14K     | 58   | 40   | 40    | ID    | 0     | 0           | 42           | 58    | 42    | 58    | 0    | 0    |
| P/17K     | 58   | 40   | 40    | 0     | ID    | 0           | 42           | 58    | 42    | 58    | 0    | 0    |
| P/18K_H6  | 58   | 40   | 40    | 0     | 0     | ID          | 42           | 58    | 42    | 58    | 0    | 0    |
| P/18K_H11 | 60   | 36   | 36    | 42    | 42    | 42          | ID           | 60    | 0     | 60    | 42   | 42   |
| P/23K     | 0    | 56   | 57    | 58    | 58    | 58          | 60           | ID    | 60    | 0     | 58   | 58   |
| P/25K     | 60   | 36   | 36    | 42    | 42    | 42          | 0            | 60    | ID    | 60    | 42   | 42   |
| P/18T     | 0    | 56   | 57    | 58    | 58    | 58          | 60           | 0     | 60    | ID    | 58   | 58   |
| H/1T      | 58   | 40   | 40    | 0     | 0     | 0           | 42           | 58    | 42    | 58    | ID   | 0    |
| H/4T      | 58   | 40   | 40    | 0     | 0     | 0           | 42           | 58    | 42    | 58    | 0    | ID   |

## S3c: PA

| PA 649nt  | P/9K | P/12K | P/14K | P/17K | P/18K<br>H6 | P/18K<br>H11 | P/23K | P/25K | P/18T | H/1T | H/4T |
|-----------|------|-------|-------|-------|-------------|--------------|-------|-------|-------|------|------|
| P/9K      | ID   | 33    | 25    | 25    | 29          | 27           | 29    | 27    | 29    | 28   | 28   |
| P/12K     | 33   | ID    | 26    | 26    | 30          | 28           | 30    | 28    | 30    | 29   | 29   |
| P/14K     | 25   | 26    | ID    | 0     | 24          | 22           | 20    | 22    | 20    | 23   | 23   |
| P/17K     | 25   | 26    | 0     | ID    | 24          | 22           | 20    | 22    | 20    | 23   | 23   |
| P/18K_H6  | 29   | 30    | 24    | 24    | ID          | 2            | 16    | 2     | 16    | 1    | 1    |
| P/18K_H11 | 27   | 28    | 22    | 22    | 2           | ID           | 14    | 0     | 14    | 1    | 1    |
| P/23K     | 29   | 30    | 20    | 20    | 16          | 14           | ID    | 14    | 0     | 15   | 15   |
| P/25K     | 27   | 28    | 22    | 22    | 2           | 0            | 14    | ID    | 14    | 1    | 1    |
| P/18T     | 29   | 30    | 20    | 20    | 16          | 14           | 0     | 14    | ID    | 15   | 15   |
| H/1T      | 28   | 29    | 23    | 23    | 1           | 1            | 15    | 1     | 15    | ID   | 0    |
| H/4T      | 28   | 29    | 23    | 23    | 1           | 1            | 15    | 1     | 15    | 0    | ID   |

## S3d: H6

| H6 909nt | P/4K | P/14K | P/17K | P/18K<br>H6 | P/23K | P/18T | H/1T | H/4T |
|----------|------|-------|-------|-------------|-------|-------|------|------|
| P/4K     | ID   | 60    | 61    | 61          | 0     | 0     | 61   | 61   |
| P/14K    | 60   | ID    | 1     | 1           | 60    | 60    | 1    | 1    |
| P/17K    | 61   | 1     | ID    | 0           | 61    | 61    | 0    | 0    |
| P/18K_H6 | 61   | 1     | 0     | ID          | 61    | 61    | 0    | 0    |
| P/23K    | 0    | 60    | 61    | 61          | ID    | 0     | 61   | 61   |
| P/18T    | 0    | 60    | 61    | 61          | 0     | ID    | 61   | 61   |
| H/1T     | 61   | 1     | 0     | 0           | 61    | 61    | ID   | 0    |
| H/4T     | 61   | 1     | 0     | 0           | 61    | 61    | 0    | ID   |

## S3e: H11

| H11 596nt | P/12K | P/18K<br>H11 | P/25K |
|-----------|-------|--------------|-------|
| P/12K     | ID    | 12           | 11    |
| P/18K_H11 | 12    | ID           | 1     |
| P/25K     | 11    | 1            | ID    |

## S3f: NP

| NP 797nt  | P/3K | P/12K | P/14K | P/17K | P/18K<br>H6 | P/18K<br>H11 | P/23K | P/25K | P/18T | H/1T | H/4T |
|-----------|------|-------|-------|-------|-------------|--------------|-------|-------|-------|------|------|
| P/3K      | ID   | 55    | 53    | 53    | 0           | 0            | 55    | 0     | 55    | 0    | 0    |
| P/12K     | 55   | ID    | 21    | 21    | 55          | 55           | 18    | 55    | 18    | 55   | 55   |
| P/14K     | 53   | 21    | ID    | 0     | 53          | 53           | 11    | 53    | 11    | 53   | 53   |
| P/17K     | 53   | 21    | 0     | ID    | 53          | 53           | 11    | 53    | 11    | 53   | 53   |
| P/18K_H6  | 0    | 55    | 53    | 53    | ID          | 0            | 55    | 0     | 55    | 0    | 0    |
| P/18K_H11 | 0    | 55    | 53    | 53    | 0           | ID           | 55    | 0     | 55    | 0    | 0    |
| P/23K     | 55   | 18    | 11    | 11    | 55          | 55           | ID    | 55    | 0     | 55   | 55   |
| P/25K     | 0    | 55    | 53    | 53    | 0           | 0            | 55    | ID    | 55    | 0    | 0    |
| P/18T     | 55   | 18    | 11    | 11    | 55          | 55           | 0     | 55    | ID    | 55   | 55   |
| H/1T      | 0    | 55    | 53    | 53    | 0           | 0            | 55    | 0     | 55    | ID   | 0    |
| H/4T      | 0    | 55    | 53    | 53    | 0           | 0            | 55    | 0     | 55    | 0    | ID   |

## S3g: N2

| N2 322nt | P/12K | P/17K | P/23K |
|----------|-------|-------|-------|
| P/12K    | ID    | 1     | 21    |
| P/17K    | 1     | ID    | 20    |
| P/23K    | 21    | 20    | ID    |

## S3h: N9

| N9 382nt  | P/18K<br>H6 | P/18K<br>H11 | P/25K | H/1T | H/4T |
|-----------|-------------|--------------|-------|------|------|
| P/18K_H6  | ID          | 0            | 0     | 0    | 0    |
| P/18K_H11 | 0           | ID           | 0     | 0    | 0    |
| P/25K     | 0           | 0            | ID    | 0    | 0    |
| H/1T      | 0           | 0            | 0     | ID   | 0    |
| H/4T      | 0           | 0            | 0     | 0    | ID   |

## S3i: MP

| MP 804nt  | P/4K | P/9K | P/12K | P/14K | P/17K | P/18K<br>H6 | P/18K<br>H11 | P/23K | P/25K | P/18T | H/1T | H/4T |
|-----------|------|------|-------|-------|-------|-------------|--------------|-------|-------|-------|------|------|
| P/4K      | ID   | 39   | 39    | 39    | 39    | 41          | 41           | 0     | 41    | 0     | 41   | 41   |
| P/9K      | 39   | ID   | 10    | 10    | 10    | 14          | 14           | 39    | 14    | 39    | 14   | 14   |
| P/12K     | 39   | 10   | ID    | 0     | 0     | 10          | 10           | 39    | 10    | 39    | 10   | 10   |
| P/14K     | 39   | 10   | 0     | ID    | 0     | 10          | 10           | 39    | 10    | 39    | 10   | 10   |
| P/17K     | 39   | 10   | 0     | 0     | ID    | 10          | 10           | 39    | 10    | 39    | 10   | 10   |
| P/18K_H6  | 41   | 14   | 10    | 10    | 10    | ID          | 0            | 41    | 0     | 41    | 0    | 0    |
| P/18K_H11 | 41   | 14   | 10    | 10    | 10    | 0           | ID           | 41    | 0     | 41    | 0    | 0    |
| P/23K     | 0    | 39   | 39    | 39    | 39    | 41          | 41           | ID    | 41    | 0     | 41   | 41   |
| P/25K     | 41   | 14   | 10    | 10    | 10    | 0           | 0            | 41    | ID    | 41    | 0    | 0    |
| P/18T     | 0    | 39   | 39    | 39    | 39    | 41          | 41           | 0     | 41    | ID    | 41   | 41   |
| H/1T      | 41   | 14   | 10    | 10    | 10    | 0           | 0            | 41    | 0     | 41    | ID   | 0    |
| H/4T      | 41   | 14   | 10    | 10    | 10    | 0           | 0            | 41    | 0     | 41    | 0    | ID   |

## S3j: NS

| NS 331nt  | P/4K | P/4K | P/9K | P/12K | P/14K | P/17K | P/18K<br>H6 | P/18K<br>H11 | P/23K | P/25K | P/18T | H/1T | H/4T |
|-----------|------|------|------|-------|-------|-------|-------------|--------------|-------|-------|-------|------|------|
| P/3K      | ID   | 57   | 58   | 3     | 3     | 3     | 0           | 0            | 57    | 0     | 56    | 0    | 0    |
| P/4K      | 57   | ID   | 6    | 58    | 58    | 58    | 57          | 57           | 0     | 57    | 1     | 57   | 57   |
| P/9K      | 58   | 6    | ID   | 59    | 59    | 59    | 58          | 58           | 6     | 58    | 5     | 58   | 58   |
| P/12K     | 3    | 58   | 59   | ID    | 0     | 0     | 3           | 3            | 58    | 3     | 57    | 3    | 3    |
| P/14K     | 3    | 58   | 59   | 0     | ID    | 0     | 3           | 3            | 58    | 3     | 57    | 3    | 3    |
| P/17K     | 3    | 58   | 59   | 0     | 0     | ID    | 3           | 3            | 58    | 3     | 57    | 3    | 3    |
| P/18K_H6  | 0    | 57   | 58   | 3     | 3     | 3     | ID          | 0            | 57    | 0     | 56    | 0    | 0    |
| P/18K_H11 | 0    | 57   | 58   | 3     | 3     | 3     | 0           | ID           | 57    | 0     | 56    | 0    | 0    |
| P/23K     | 57   | 0    | 6    | 58    | 58    | 58    | 57          | 57           | ID    | 57    | 1     | 57   | 57   |
| P/25K     | 0    | 57   | 58   | 3     | 3     | 3     | 0           | 0            | 57    | ID    | 56    | 0    | 0    |
| P/18T     | 56   | 1    | 5    | 57    | 57    | 57    | 56          | 56           | 1     | 56    | ID    | 56   | 56   |
| H/1T      | 0    | 57   | 58   | 3     | 3     | 3     | 0           | 0            | 57    | 0     | 56    | ID   | 0    |
| H/4T      | 0    | 57   | 58   | 3     | 3     | 3     | 0           | 0            | 57    | 0     | 56    | 0    | ID   |

**Table S3: Nucleic acid sequence identity matrices of the locality P and H avian influenza virus segments.** The matrices were constructed using the BioEdit program on the basis of nucleotides 1251-2288 (1038) of PB2, 1465-2289 (825) of PB1, 783-1401 (649) of PA, 816-1724 (909) of H6, 679-1274 (596) of H11, 748-1544 (797) of NP, 568-889 (322) of N2, 1050-1431 (382) of N9, 203-1006 (804) of MP, and 540-870 (331) of NS. The tables were highlighted with a segment specific color which is corresponding to Figures 1 and 2 and the abbreviations with Table 1 respectively.
